# Supplementary material for: Multi-layered Spatial Transcriptomics Identify Secretory Factors Promoting Human Hematopoietic Stem Cell Development
Source: PubMed Central journal article supplement (PMC7671940; doi:10.1016/j.stem.2020.08.004), 2020-11-05
Supplement: mmc1.pdf [file mmc1.pdf]

**Cell Stem Cell, Volume 27**

## **Supplemental Information**

### **Multi-layered Spatial Transcriptomics Identify**

### **Secretory Factors Promoting Human**

### **Hematopoietic Stem Cell Development**

**Edie I. Crosse, Sabrina Gordon-Keylock, Stanislav Rybtsov, Anahi Binagui-Casas, Hannah Felchle, Nneka C. Nnadi, Kristina Kirschner, Tamir Chandra, Sara Tamagno, David J. Webb, Fiona Rossi, Richard A. Anderson, and Alexander Medvinsky**

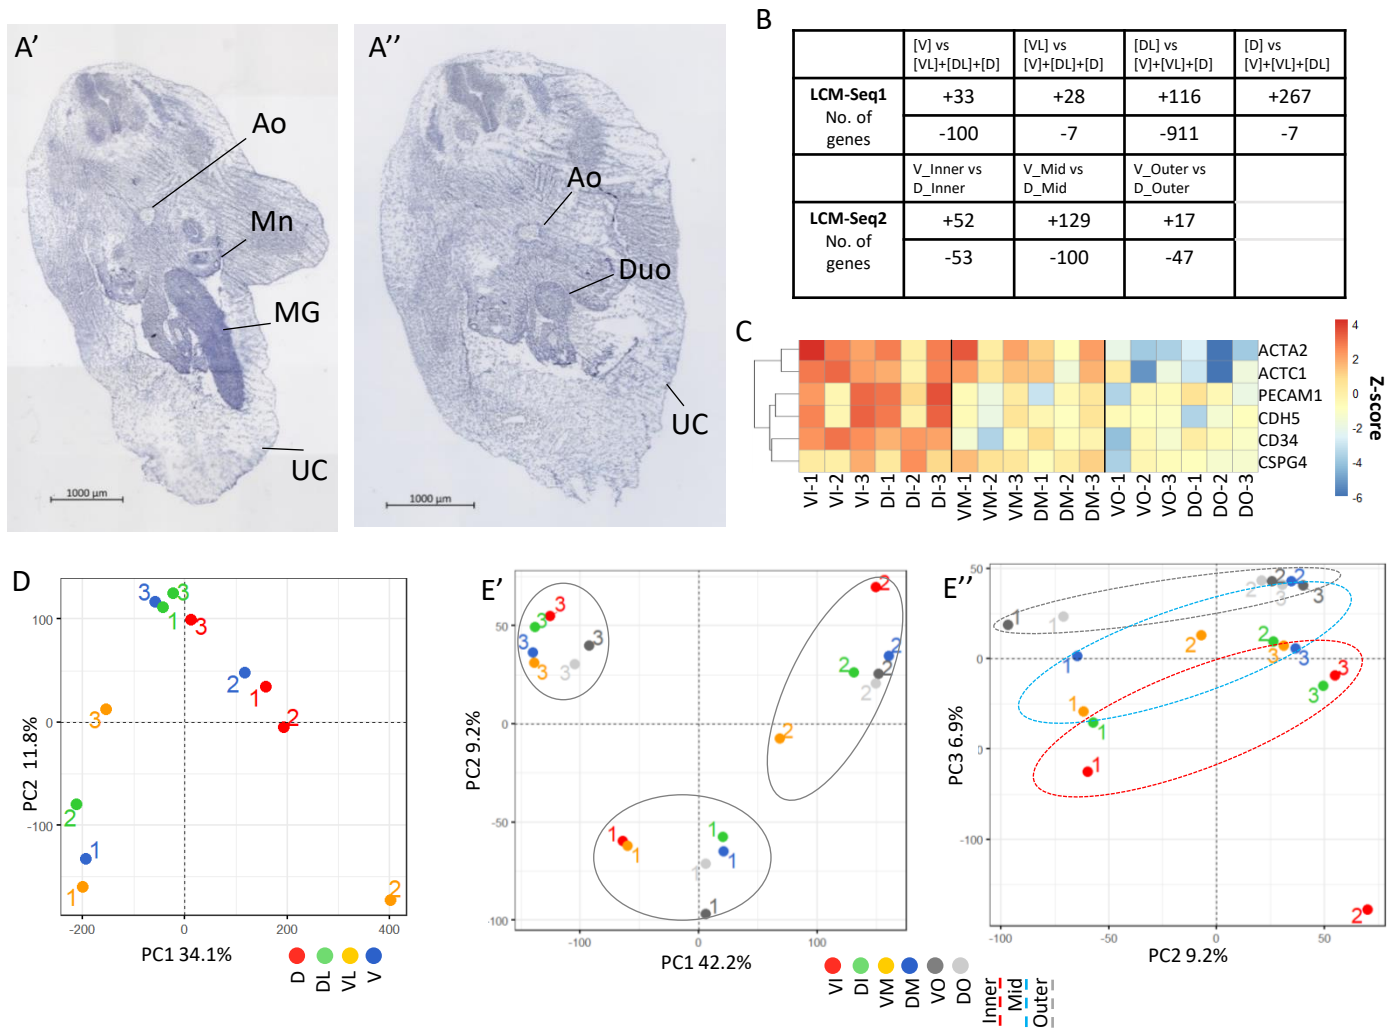

**Figure S1, related to Figure 1.**

(A) Representative images of anatomical landmarks used for identification of the region to take for LCM-Seq from CS16 transverse sections. A' shows the midgut loop (MG) protruding into the umbilical cord (UC), Ao= Dorsal Aorta, Mn = Mesonephros. A'' shows appearance of the duodenum (Duo) and disappearance of the MG.

(B) Table of differentially expressed genes in LCMSeq1 and LCMSeq2 analyses (+ = upregulated, - = downregulated,  $p_{adj} < 0.05$ ).

(C) Heatmap of In-normalised gene expression for key endothelial and mesenchymal markers (LCM-Seq2).

(D) PCA analysis of LCM-Seq1 showing PC1 vs PC2. V=Ventral, VL=Ventro-lateral, DL=Dorsal=lateral, D=Dorsal

(E) PCA analysis of LCM-Seq2 showing PC1 vs PC2 (E') and PC2 vs PC3 (E''). V/DI = Ventral/Dorsal Inner, V/DM = Ventral/Dorsal Mid, V/DO = Ventral/Dorsal Outer, N=3 embryos.

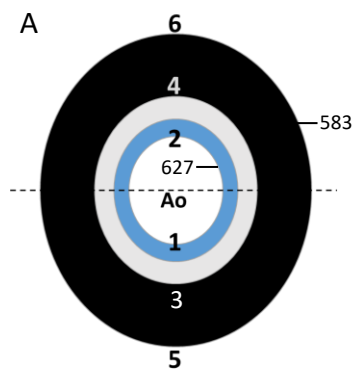

|                                                 | NES   | FDR  |
|-------------------------------------------------|-------|------|
| Reactome Defensins                              | -1.99 | 0.02 |
| Spermatogenesis                                 | -1.45 | 0.05 |
| Nucleotide-like Purinergic Receptors            | -1.73 | 0.07 |
| Smooth Muscle Contraction                       | 2.75  | 0.00 |
| Integrin B3 Pathway                             | 2.26  | 0.00 |
| Epithelial Mesenchymal Transition               | 2.32  | 0.00 |
| TGF Beta Signaling                              | 2.31  | 0.00 |
| TNFA Signaling Via Nfkb                         | 2.23  | 0.00 |
| Androgen Response                               | 2.14  | 0.00 |
| Hypoxia                                         | 2.08  | 0.00 |
| IL2 Stat5 Signaling                             | 1.94  | 0.00 |
| MTORC1 Signaling                                | 1.88  | 0.00 |
| Myogenesis                                      | 1.82  | 0.00 |
| Coagulation                                     | 1.76  | 0.00 |
| Rho GTPases Activate PAKS                       | 2.20  | 0.00 |
| Wnt Beta Catenin Signaling                      | 1.76  | 0.00 |
| Unfolded Protein Response                       | 1.78  | 0.00 |
| PDGFRb Pathway                                  | 2.17  | 0.00 |
| Cell Extracellular Matrix Interactions          | 2.18  | 0.00 |
| Response To Elevated Platelet Cytosolic Ca2plus | 2.19  | 0.00 |
| Nectin Pathway                                  | 2.17  | 0.00 |
| Apoptosis                                       | 1.72  | 0.00 |
| Reactive Oxygen Species Pathway                 | 1.71  | 0.00 |
| Lymph Angiogenesis Pathway                      | 2.12  | 0.00 |

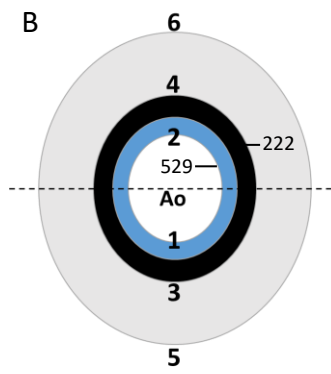

|                                                     | NES   | FDR  |
|-----------------------------------------------------|-------|------|
| DNA Methylation                                     | -2.13 | 0.00 |
| Mitosis                                             | -2.00 | 0.00 |
| Transcription                                       | -1.99 | 0.01 |
| TGF Beta Signaling                                  | 1.71  | 0.03 |
| Nectin Pathway                                      | 2.00  | 0.05 |
| IL23 Pathway                                        | 1.89  | 0.06 |
| Maturity Onset Diabetes of the Young                | 1.86  | 0.06 |
| Integrin A9b1 Pathway                               | 1.84  | 0.07 |
| Integrin Cell Surface Interactions                  | 1.77  | 0.07 |
| IL2 Stat5 Signaling                                 | 1.57  | 0.07 |
| Leukocyte Transendothelial Migration                | 1.77  | 0.07 |
| Platelet Activation Signaling And Aggregation       | 1.82  | 0.08 |
| Gap Junction Assembly                               | 1.75  | 0.09 |
| Notch4 Intracellular Domain Regulates Transcription | 1.73  | 0.09 |
| Pre Notch Processing In Golgi                       | 1.73  | 0.09 |
| Integrin3 Pathway                                   | 1.71  | 0.10 |
| Signaling By Ras Mutants                            | 1.65  | 0.14 |
| Oncogenic Mapk Signaling                            | 1.62  | 0.16 |
| Response To Elevated Platelet Cytosolic Ca2plus     | 1.59  | 0.18 |
| ErbB4 Pathway                                       | 1.57  | 0.19 |
| Basigin Interactions                                | 1.54  | 0.19 |
| Thrombin Par4 Pathway                               | 1.55  | 0.19 |
| IL8 Cxcr2 Pathway                                   | 1.55  | 0.19 |

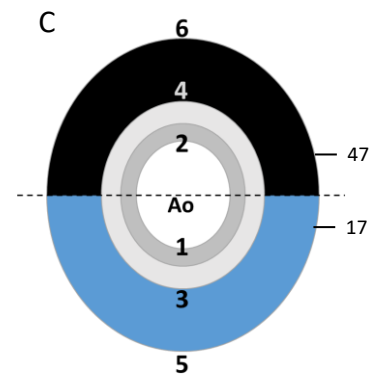

|                                                                     | NES   | FDR  |
|---------------------------------------------------------------------|-------|------|
| E2F Targets                                                         | -2.66 | 0.00 |
| Myc Targets V1                                                      | -2.60 | 0.00 |
| DNA Replication/Mitosis pathways                                    | -2.42 | 0.00 |
| Oxidative Phosphorylation                                           | -2.15 | 0.00 |
| Regulation of mRNA Stability By Proteins That Bind AU Rich Elements | -2.28 | 0.00 |
| Fatty Acid Metabolism                                               | -2.00 | 0.00 |
| Ribosome                                                            | -2.17 | 0.00 |
| Gluconeogenesis                                                     | -2.17 | 0.00 |
| Mitochondrial Translation                                           | -2.14 | 0.00 |
| Regulation Of Runx3 Expression And Activity                         | -2.10 | 0.00 |
| PDGFRA Pathway                                                      | 2.15  | 0.02 |
| EPO Pathway                                                         | 2.16  | 0.02 |
| IGF1 Pathway                                                        | 1.97  | 0.07 |
| NFAT TF pathway                                                     | 1.98  | 0.08 |
| Receptor Type Tyrosine Phosphatases                                 | 1.99  | 0.09 |
| Notch HLH Transcription Pathway                                     | 1.93  | 0.10 |
| PDGF Pathway                                                        | 1.90  | 0.11 |
| TPO Pathway                                                         | 1.89  | 0.11 |
| Nucleotide Like Purinergic Receptors                                | 1.82  | 0.13 |
| CD8 TCR Downstream                                                  | 1.85  | 0.14 |
| EGF Pathway                                                         | 1.84  | 0.14 |
| Renin Angiotensin System                                            | 1.84  | 0.14 |

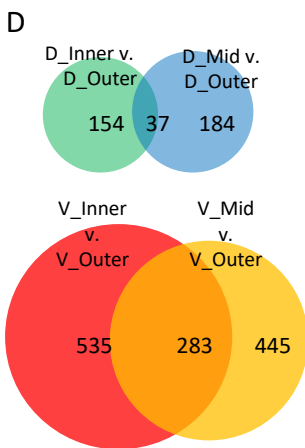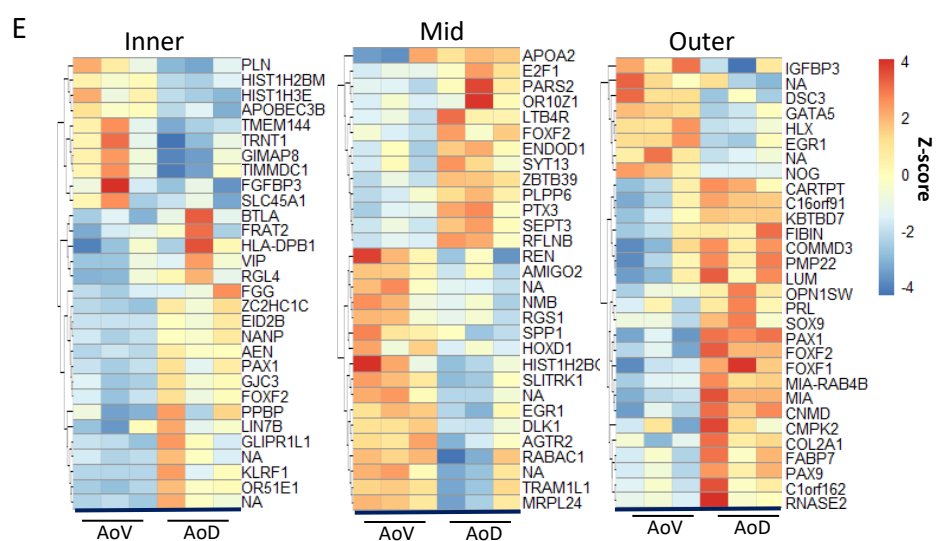

**Figure S2, related to Figure 1.**

(A) Selected pathways enriched in both V\_Inner vs V\_Outer and D\_Inner vs D\_Outer comparisons, FDR<0.25,

(B) Selected pathways enriched in both V\_Inner vs V\_Mid and D\_Inner vs D\_Mid comparisons, FDR<0.25. ((A-C) Numbers on schematics show the numbers of genes differentially upregulated in specific sub-domain, p.adj<0.05)

(C) Top differentially enriched pathways ranked by FDR for V\_Outer vs D\_Outer, FDR<0.25

(D) Number of overlapping pathways (FDR<0.25) between Inner vs Outer and Mid vs Outer for the dorsal (top) and ventral (bottom).

(E) Top 30 genes by significance for ventral vs. dorsal contrast in each concentric layer (p.adj<0.05, NA = Ensembl ID has no assigned gene name).

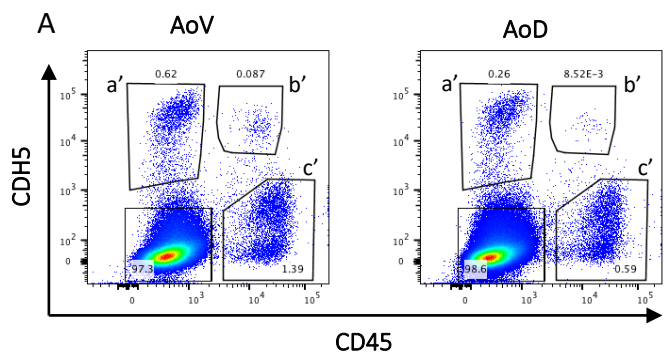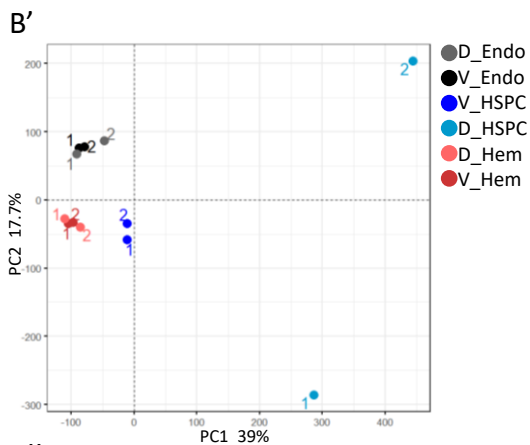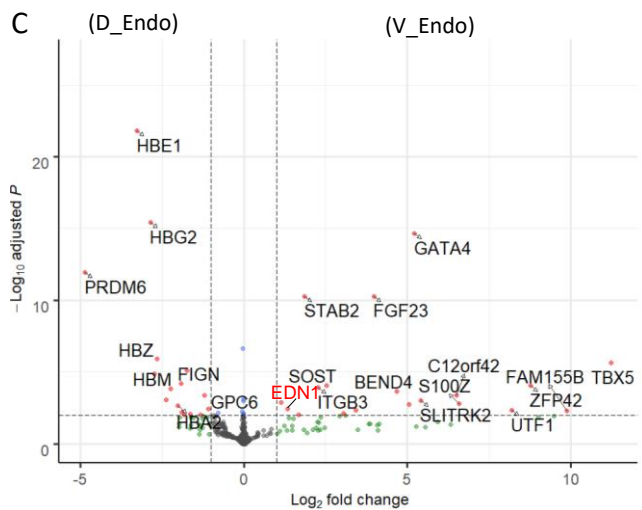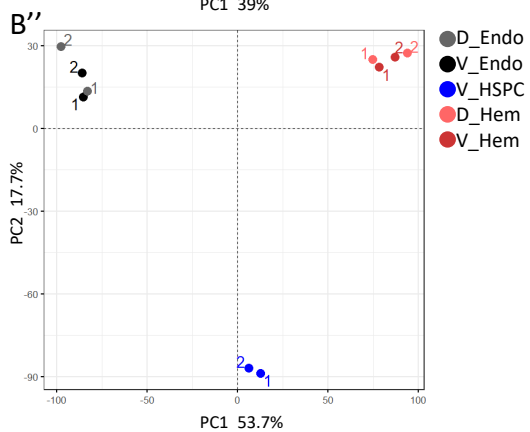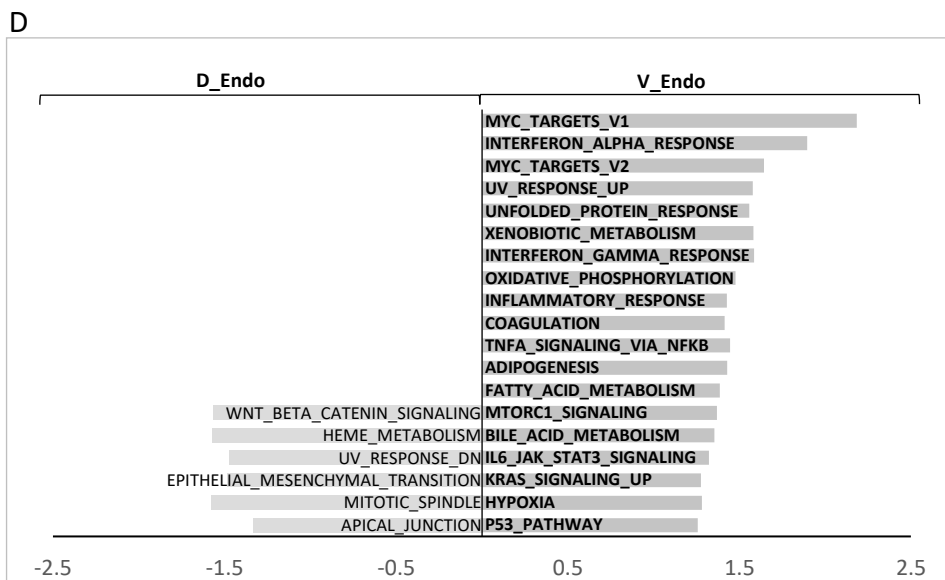

**Figure S3, related to Figure 3.**

- (A) Sorting strategy for hematoendothelial populations. The dorsal aorta (Ao) was manually bisected into ventral (AoV) and dorsal (AoD) and sorted based on VC and CD45 expression that gave V/D\_Endo (a'), V/D\_HSPC (b'), V/D\_Hem (c') populations.
- (B) PCA of haematoendothelial populations including D\_HSPC population (B') and after exclusion from further consideration (B''). 1 and 2 indicate independent embryos.
- (C) Volcano plot of differentially expressed genes between V\_Endo and D\_Endo populations (positive and negative loading respectively).
- (D) All GSEA pathways for V\_Endo vs D\_Endo populations.

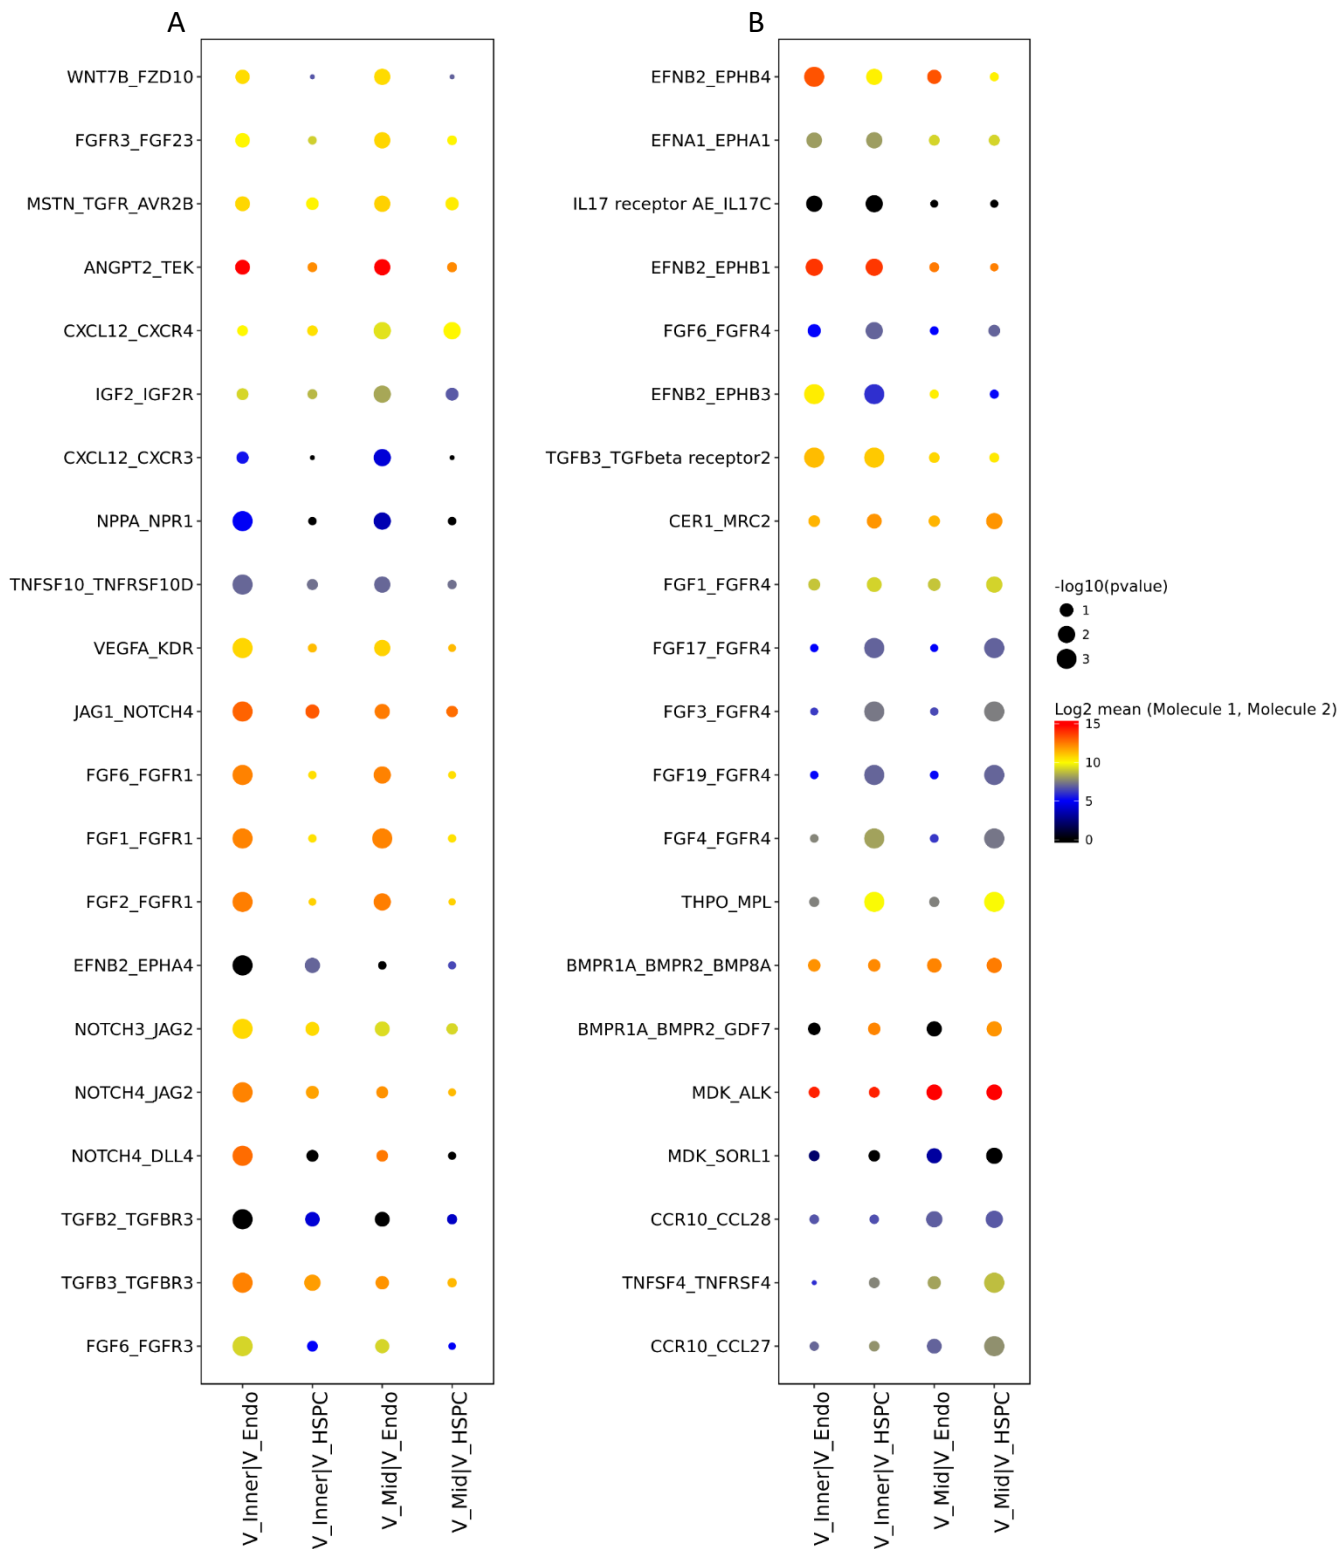

**Figure S4, related to Figure 3.** CellPhoneDB v2.0 ligand receptor interactions for V\_Inner and V\_Mid subdomains with V\_Endo and V\_HSPC populations. Size of spot indicates significance ( $-\log_{10}(\text{pvalue})$ ). Colour indicates expression levels ( $\text{Log}_2 \text{ mean (Molecule 1, Molecule 2)}$ ).

(A) Top interactions by p.value for V\_Inner/Mid vs V\_Endo.

(B) (B) Top interactions by p.value for V\_Inner/Mid vs V\_HSPC.  $p < 0.01$

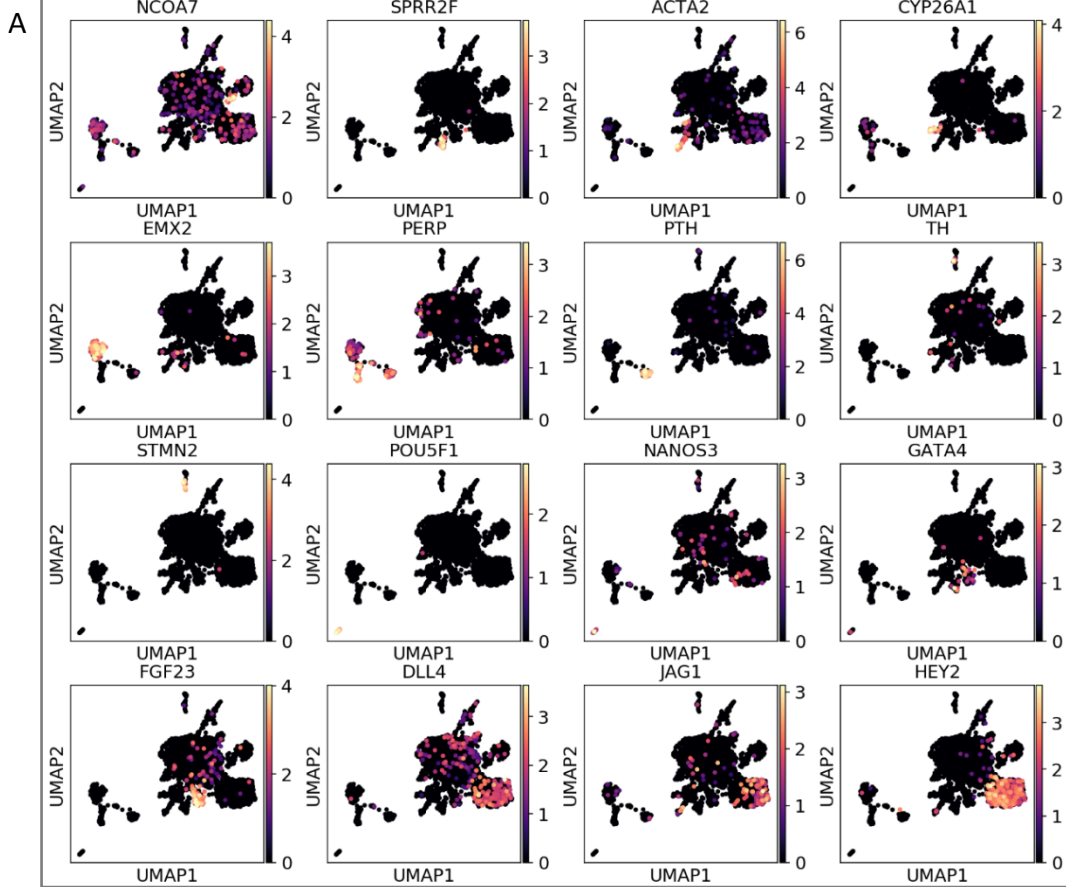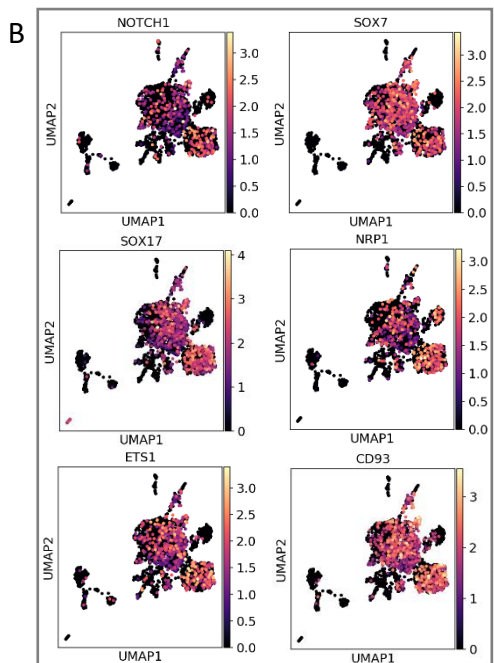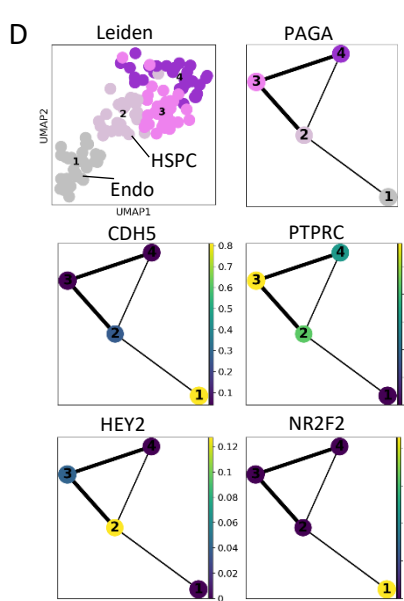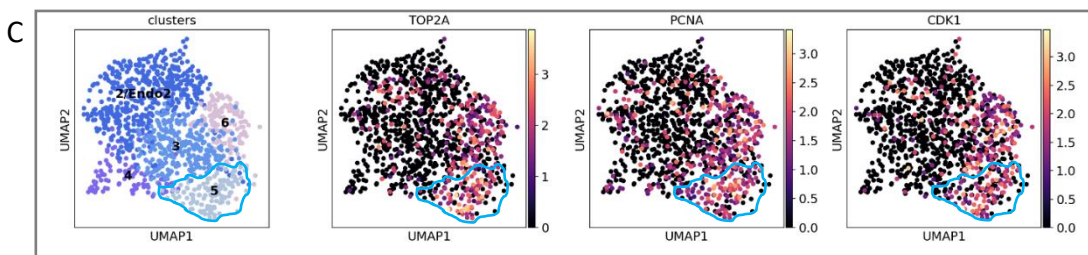



**Figure S5, related to Figure 4.**

- (A) Expression mapping of ln-normalised top marker genes to CS16 AoV single cell dataset UMAP.
- (B) Expression mapping of additional ln-normalised arterial markers to CS16 AoV single cell dataset UMAP.
- (C) Subsetted central endothelial network clusters from AoV dataset with mapped ln-normalised expression of proliferation associated genes. The blue line outlines cluster 5.
- (D) Second CS16 single cell dataset of Ao endothelial and HSPCs (N=1). Lineage relationships predicted by PAGA with expression levels of key genes indicated for each cluster.

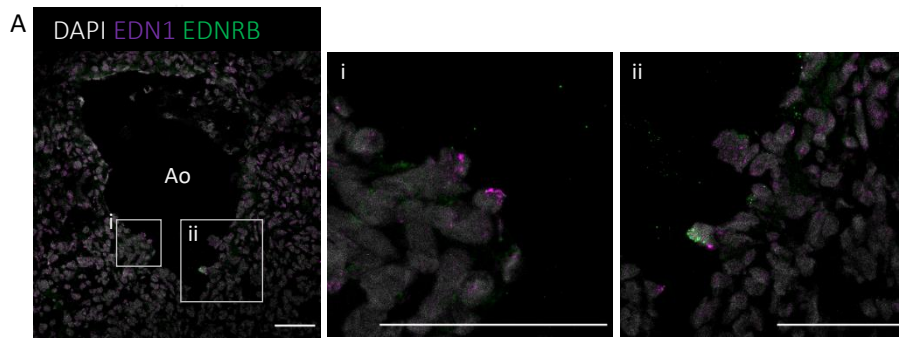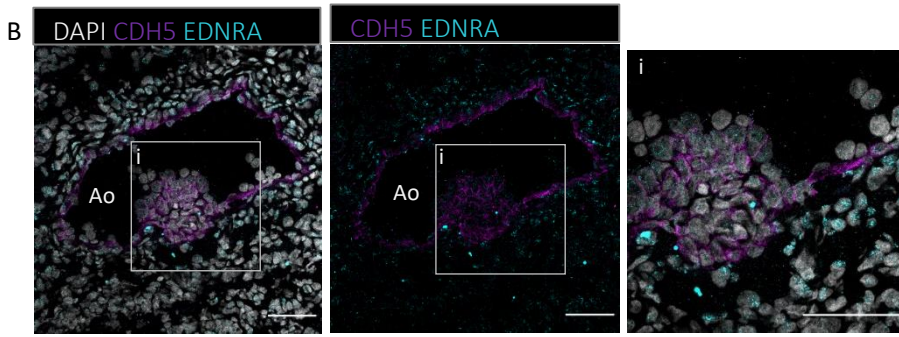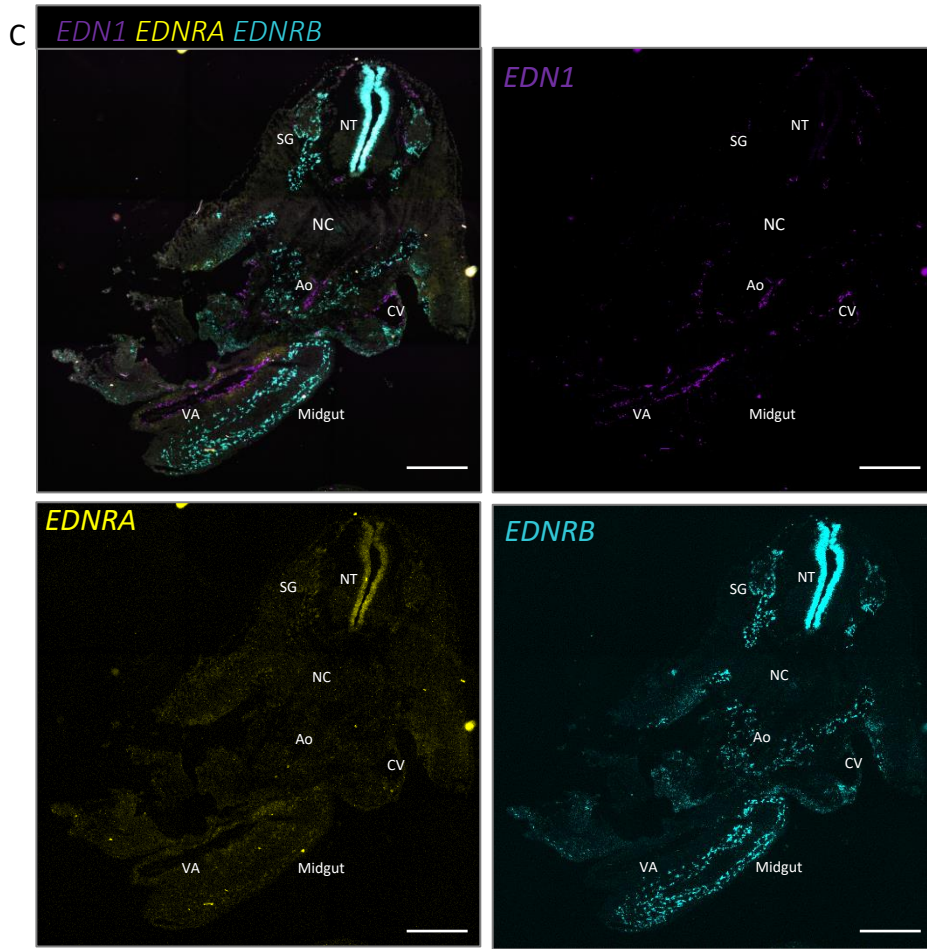

**Figure S6, related to Figure 6.**

- (A) EDN1, EDNRB immunostaining (confocal microscopy). Images in i and ii show enlarged area of the boxed region in (A).
- (B) CDH5 and EDNRA immunostaining in the dorsal aorta (Ao) and surrounding mesenchyme. Scale bars = 50 $\mu$ m. Image in i show enlarged area of the boxed region in (B).
- (A) EDN1, EDNRA and EDNRB mRNA across a CS16 whole tissue section (RNAScope). NT = neural tube, NC = notochord, Ao = dorsal aorta, CV = cardinal vein, VA = vitelline artery. SG = spinal ganglia, scale bars = 500 $\mu$ m.

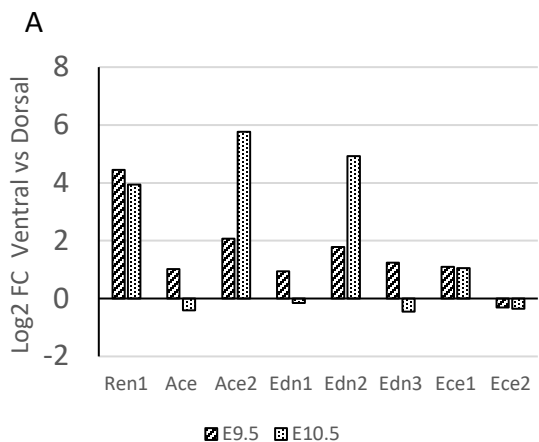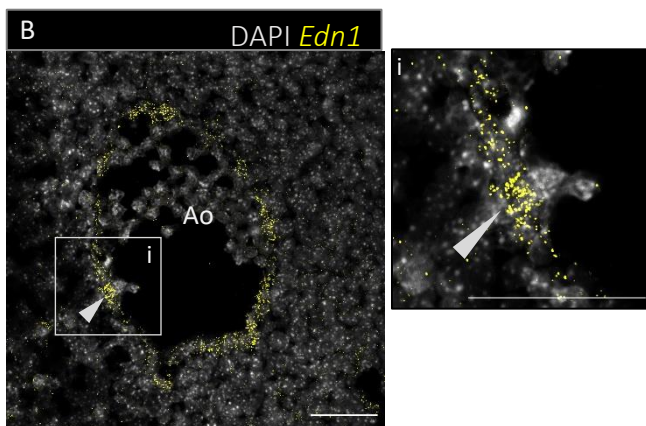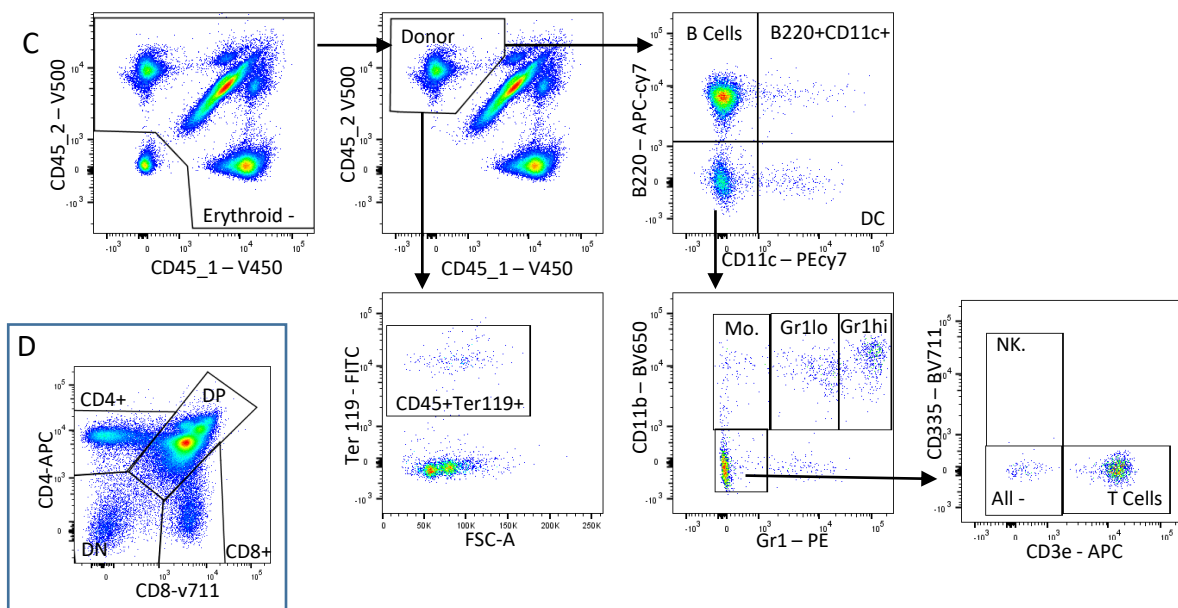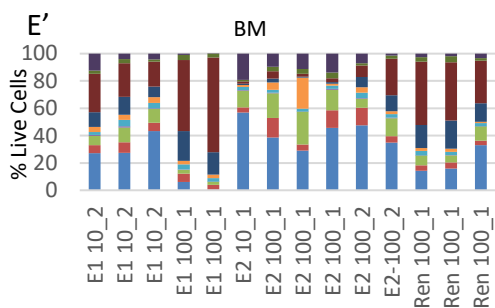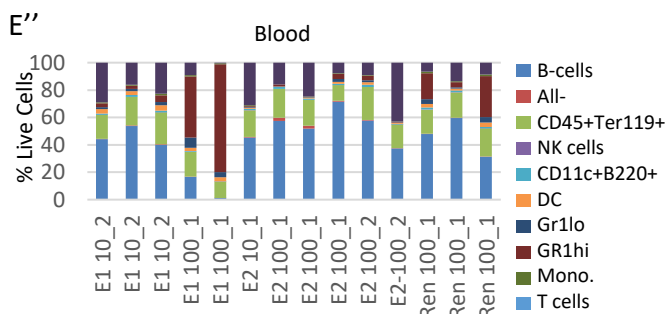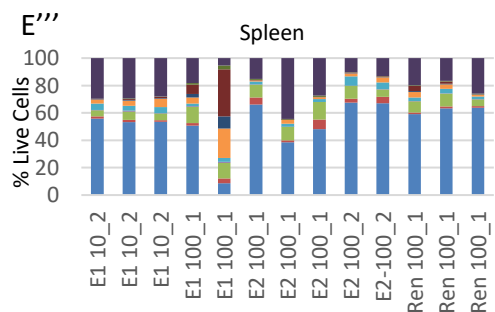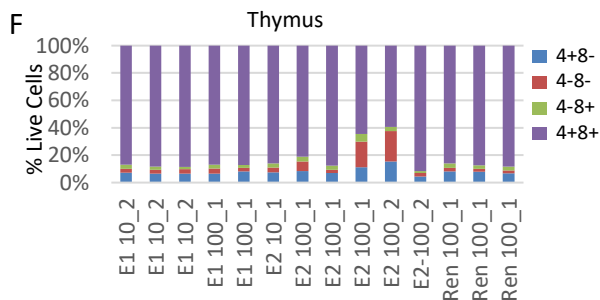

**Figure S7, related to Figure 7.**

(A) Log<sub>2</sub> fold change of the mouse AoV vs AoD at E9.5 and E10.5. Dataset from A.McGarvey et al., 2017.

(B) *Edn1* mRNA expression in E10.5 dorsal aorta (Ao). Arrowhead shows *Edn1* hotspot directly below IAHC.

(C) Representative multilineage analysis of harvested recipient's organs from reconstituted recipients shown in Figure 7D;

(D) Representative donor-derived cell contribution into the recipient's thymus of reconstituted recipients.

(E, E', E'', F) Donor-derived cell composition of the bone marrow (BM), blood, spleen and thymus (each population is shown as a percentage of live cells).

| Analysis set | Dissection strategy                             | Subdomain      | Shorthand | Description                   |
|--------------|-------------------------------------------------|----------------|-----------|-------------------------------|
| LCM-Seq1     | D-V axis across entire Ao calibre (Figure 1A)   | Ventral        | [V]       | Vessel wall (3-4 cells depth) |
|              |                                                 | Ventro-lateral | [VL]      |                               |
|              |                                                 | Dorsal-lateral | [DL]      |                               |
|              |                                                 | Dorsal         | [D]       |                               |
| LCM-Seq2     | Concentric layers radiating from Ao (Figure 2A) | Ventral Inner  | V_Inner   | Endothelial/Perivascular      |
|              |                                                 | Dorsal Inner   | D_Inner   | Endothelial/Perivascular      |
|              |                                                 | Ventral Mid    | V_Mid     | Sub-aortic stroma             |
|              |                                                 | Dorsal Mid     | D_Mid     | Sub-aortic stroma             |
|              |                                                 | Ventral Outer  | V_Outer   | Outer stroma                  |
|              |                                                 | Dorsal Outer   | D_Outer   | Outer stroma                  |

**Table S1, related to Figures 1 and 2.** Nomenclature for sub-domains microdissected for LCM-Seq1 and LCM-Seq2 analyses.

| Analysis set                                                                | Dorsal/Ventral | Population | Shorthand | Description                                |
|-----------------------------------------------------------------------------|----------------|------------|-----------|--------------------------------------------|
| Sorted<br>haematoendothelial<br>populations from<br>AoV and AoD<br>(RNAseq) | Ventral        | VC+CD45-   | V_Endo    | Endothelial                                |
|                                                                             | Ventral        | VC+CD45+   | V_HSPC    | Haematopoietic<br>Stem Progenitor<br>Cells |
|                                                                             | Ventral        | VC-CD45+   | V_Hem     | Mature<br>haematopoietic                   |
|                                                                             | Dorsal         | VC+CD45-   | D_Endo    | Endothelial                                |
|                                                                             | Dorsal         | VC+CD45+   | D_HSPC    | Haematopoietic<br>Stem Progenitor<br>Cells |
|                                                                             | Dorsal         | VC-CD45+   | D_Hem     | Mature<br>haematopoietic                   |

**Table S2, related to Figure 3.** Nomenclature for the sorted HE populations dataset.
